# Supplementary material for: A polymorphism in the tumor suppressor p53 affects aging and longevity in mouse models
Source: eLife journal article supplement (doi:10.7554/elife.34701), 2018-03-20
Supplement: supp [file elife-34701-supp-v1.zip]

Archive with 7 entries (7 files):
- elife_poa_e34701_Transparent_Reporting_File.pdf
- elife_poa_e34701_Figure_5_source_data_1.xlsx
- elife_poa_e34701_Figure_6_source_data_1.xlsx
- elife_poa_e34701_Figure_4_source_data_1.xlsx
- elife_poa_e34701_Figure_1_figure_supplement_1.pdf
- elife_poa_e34701_Figure_5_figure_supplement_1.pdf
- elife_poa_e34701_Figure_3_source_data_1.xlsx
