# Supplementary material for: A polymorphism in the tumor suppressor p53 affects aging and longevity in mouse models
Source: eLife journal article supplement (doi:10.7554/elife.34701), 2018-03-20
Supplement: supp [file elife-34701-supp-v1.zip › elife_poa_e34701_Figure_3_source_data_1.xlsx]

## Sheet: Fig 3B&H
Figure 3-Source data 1
Figure 3B Average of spine angle from 6-month-old and 18-month-old 129SVsl R72 and P72 mice
	6-month old		18-month old
n	R72	P72	R72	P72
1	95	111	80	82
2	112	98	61	85
3	91	96	81	104
4	103	88	93	110
5	104	96	86	95
Mean	101	97.8	80.2	95.2
SD	8.22	8.32	11.9	11.99
p-value	0.310 (R72 vs P72)		0.012 (R72 vs P72)
Significance			*
Figure 3H Average of spine angle from 6-month-old and 18-month-old C57BL/6J R72 and P72 mice
	6-month old		18-month old
n	R72	P72	R72	P72
1	126	117	116	119
2	117	129	106	118
3	129	127	115	121
4	125	124	111	123
5	123	125	119	119
Mean	124	124.4	113.4	120
SD	4.47	4.56	5.03	2
p-value	0.446 (R72 vs P72)		0.026 (R72 vs P72)
Significance			*
Note: Data collected from paired samples were analyzed using one-tailed Student's t-test.

## Sheet: Fig 3D&I
Figure 3-Source data 2
Figure 3D Quantification of bone volume relative to total volume of tibias from micro-CT scans of 129SVsl R72 and P72 mice at different ages
	6-month old		12-month old		18-month old		24-month old
n	R72	P72	R72	P72	R72	P72	R72	P72
1	1.05	1.05	0.58	0.49	0.44	0.71	0.61	0.4
2	1.11	1.07	0.92	0.91	0.62	0.86	0.31	0.45
3	0.84	0.87	0.75	1.26	0.64	1.06	0.45	0.42
Mean	1	1	0.75	0.89	0.57	0.88	0.46	0.42
SD	0.14	0.11	0.17	0.39	0.11	0.17	0.15	0.03
p-value			0.272 (R72 vs P72)		0.015 (R72 vs P72)		0.386 (R72 vs P72)
Significance					*
Figure 3I Quantification of bone volume relative to total volume of tibias from micro-CT scans of C57BL/6J R72 and P72 mice at different ages
	6-month old		12-month old		18-month old
n	R72	P72	R72	P72	R72	P72
1	1	1.3	0.53	1.16	0.23	0.48
2	0.8	0.7	0.51	0.95	0.06	0.14
3	1.2	1	0.75	1.13	0.14	0.31
Mean	1	1	0.6	1.08	0.14	0.31
SD	0.2	0.3	0.13	0.11	0.09	0.17
p-value			0.012 (R72 vs P72)		0.038 (R72 vs P72)
Significance			*		*
Note: Data collected from paired samples were analyzed using one-tailed Student's t-test.

## Sheet: Fig 3E&J
Figure 3-Source data 3
Figure 3E Quantification of trabecular number of tibias from micro-CT scans of 129SVsl R72 and P72 mice at different ages
	6-month old		12-month old		18-month old		24-month old
n	R72	P72	R72	P72	R72	P72	R72	P72
1	1.16	0.7	0.8	0.94	0.59	0.89	0.7	0.46
2	0.98	1.19	0.69	1.02	0.39	0.81	0.43	0.6
3	0.85	1.1	0.96	1.23	0.49	0.86	0.56	0.53
Mean	1	1	0.82	1.06	0.49	0.85	0.56	0.53
SD	0.16	0.26	0.14	0.15	0.1	0.04	0.14	0.07
p-value			0.024 (R72 vs P72)		0.005 (R72 vs P72)		0.402 (R72 vs P72)
Significance			*		*
Figure 3J Quantification of trabecular number of tibias from micro-CT scans of C57BL/6J R72 and P72 mice at different ages
	6-month old		12-month old		18-month old
n	R72	P72	R72	P72	R72	P72
1	1	1.24	0.85	1.22	0.43	0.61
2	0.78	0.76	0.71	0.94	0.17	0.31
3	1.22	1	0.78	0.93	0.3	0.49
Mean	1	1	0.78	1.03	0.3	0.47
SD	0.22	0.24	0.07	0.164621	0.13	0.150997
p-value			0.030 (R72 vs P72)		0.004 (R72 vs P72)
Significance			*		*
Note: Data collected from paired samples were analyzed using one-tailed Student's t-test.

## Sheet: Fig 3F&K
Figure 3-Source data 4
Figure 3F Quantification of trabecular spacing from micro-CT scans of tibias from 129SVsl R72 and P72 mice at different ages
	6-month old		12-month old		18-month old		24-month old
n	R72	P72	R72	P72	R72	P72	R72	P72
1	0.78	1.65	1.49	0.95	2.33	1.02	1.88	2.48
2	0.97	0.81	1.36	0.92	1.63	1	1.62	1.81
3	1.25	0.54	0.78	0.61	2.08	0.83	2.8	2.17
Mean	1	1	1.21	0.83	2.01	0.95	2.1	2.15
SD	0.24	0.58	0.38	0.19	0.35	0.1	0.62	0.34
p-value			0.037 (R72 vs P72)		0.020 (R72 vs P72)		0.448 (R72 vs P72)
Significance			*		*
Figure 3K Quantification of trabecular spacing from micro-CT scans of tibias from C57BL/6J R72 and P72 mice at different ages
	6-month old		12-month old		18-month old
n	R72	P72	R72	P72	R72	P72
1	1	0.74	1.23	0.71	5.36	3.16
2	0.75	1.26	1.46	1.23	4.41	2.35
3	1.25	1	1.37	0.96	4.16	1.85
Mean	1	1	1.35	0.97	4.64	2.45
SD	0.25	0.26	0.12	0.26	0.63	0.66
p-value			0.022 (R72 vs P72)		0.001 (R72 vs P72)
Significance			*		*
Note: Data collected from paired samples were analyzed using one-tailed Student's t-test.
