# Supplementary material for: A polymorphism in the tumor suppressor p53 affects aging and longevity in mouse models
Source: eLife journal article supplement (doi:10.7554/elife.34701), 2018-03-20
Supplement: supp [file elife-34701-supp-v1.zip › elife_poa_e34701_Figure_4_source_data_1.xlsx]

## Sheet: Fig 4B
Figure 4-Source data 1
Figure 4B Quantification of dermal thickness of 129SVsl R72 and P72 mice at different ages.
	6-month old		12-month old		18-month old
n	R72	P72	R72	P72	R72	P72
1	448.5	278.64	159	240.15	168.59	240.25
2	344.5	353.95	188	267.17	173.16	219.32
3	280.95	368.11	109.66	263.47	181.8	211.65
4	386.61	337.66	261.61	226.37	163.6	214.53
5	327.11	329.91	168.54	299.33	155.73	179.99
Mean	357.53	333.65	177.36	259.3	168.57	213.15
SD	63.41	34.12	55.25	27.98	9.82	21.66
p-value	0.240 (R72 vs P72)		0.009 (R72 vs P72)		0.002 (R72 vs P72)
Significance			*		*
Note: Data collected from unpaired samples were analyzed using one-tailed student's t-test.

## Sheet: Fig 4C
Figure 4-Source data 2
Figure 4C Quantification of subcutaneous adipose layer thickness of 129SVsl R72 and P72 mice at different ages.
	6-month old		12-month old		18-month old
n	R72	P72	R72	P72	R72	P72
1	305.95	273.86	206.16	369.24	80.01	137.93
2	309.12	380.74	137.18	232.69	106.47	136
3	306.01	317	199.06	261.02	55.15	138.31
4	309.38	377.77	158.11	294.04	54.08	147.09
5	304.77	269.96	116.07	128.25	70.54	196.02
6			194.59
7			150.37
Mean	307.05	323.864	165.934	257.05	73.25	151.07
SD	2.07	53.8354	34.5277	88.25	21.52	25.49
p-value	0.252 (R72 vs P72)		0.015 (R72 vs P72)		<0.001 (R72 vs P72)
Significance			*		*
Note: Data collected from unpaired samples were analyzed using one-tailed student's t-test.

## Sheet: Fig 4D
Figure 4-Source data 3
Figure 4D Quantification of wound healing areas in 129SVsl R72 and P72 mice at different ages.
	6-month old		12-month old		18-month old
n	R72	P72	R72	P72	R72	P72
1	0.96	0.92	0.63	0.83	0.69	0.7
2	0.95	0.97	0.57	0.68	0.44	0.79
3	0.93	0.97	0.77	0.95	0.42	0.91
4	0.97	0.96	0.58	0.81	0.78	0.77
5	0.94	0.98	0.65	0.9	0.59	0.79
Mean	0.95	0.96	0.64	0.83	0.58	0.79
SD	0.02	0.02	0.08	0.1	0.16	0.08
p-value	0.202 (R72 vs P72)		0.005 (R72 vs P72)		0.014 (R72 vs P72)
Significance			*		*
Note: Data collected from unpaired samples were analyzed using one-tailed student's t-test.

## Sheet: Fig 4E
Figure 4-Source data 4
Figure 4E Quantification of wound healing areas in C57BL/6J R72 and P72 mice at different ages.
	6-month old		12-month old		18-month old
n	R72	P72	R72	P72	R72	P72
1	0.97	0.97	0.84	0.68	0.75	0.75
2	0.97	0.79	0.64	0.97	0.45	0.69
3	0.97	0.97	0.85	0.55	0.62	0.73
4	0.95	0.96	0.71	0.97	0.98	0.85
5	0.97	0.97	0.84	0.68	0.8	0.68
6	0.97	0.96	0.54	0.96	0.71	0.89
7	0.97	0.98	0.67	0.98	0.77	0.83
8	0.96	0.97	0.7	0.75	0.44	0.61
9	0.71	0.52	0.6	0.98	0.49	0.95
10	0.98	0.97	0.75	0.97	0.61	0.74
11	0.92	0.96	0.6	0.98		0.88
12	0.96	0.97	0.86	0.71		0.98
13						0.98
Mean	0.94	0.92	0.72	0.849785	0.66	0.81
SD	0.07	0.13	0.11	0.160946	0.17	0.12
p-value	0.289 (R72 vs P72)		0.014 (R72 vs P72)		0.011 (R72 vs P72)
Significance			*		*
Note: Data collected from unpaired samples were analyzed using one-tailed student's t-test.
													o
