# Supplementary material for: A polymorphism in the tumor suppressor p53 affects aging and longevity in mouse models
Source: eLife journal article supplement (doi:10.7554/elife.34701), 2018-03-20
Supplement: supp [file elife-34701-supp-v1.zip › elife_poa_e34701_Figure_5_source_data_1.xlsx]

## Sheet: Fig 5B&C
Figure 5-Source data 1
Figure 5B The percentage of LT-HSCs in the bone marrow of 129SVsl R72 and P72 mice at different ages
	6-month old		12-month old		18-month old		22-month old
n	R72	P72	R72	P72	R72	P72	R72	P72
1	22.6	21.7	26.5	19.9	37.7	19	33.3	24.9
2	18.3	12.6	26.8	17.3	38	19.4	37.9	34.8
3	14.6	10	22	14	33.6	19.8	36	33.3
4	20	23.7	28.3	24.3	36.3	19.5	37.7	33.7
5	30.5	19.7	24.6	20.6	32.7	20.9	32.6	30.5
Mean	21.2	17.54	25.64	19.22	35.66	19.72	35.5	31.44
SD	5.96	5.94	2.42	3.84	2.4	0.72	2.45	3.98
p-value	0.180 (R72 vs P72)		0.007 (R72 vs P72)		<0.001 (R72 vs P72)		0.044 (R72 vs P72)
Significance			*		*		*
Figure 5C The percentage of LT-HSCs in the bone marrow of C57BL/6J R72 and P72 mice at different ages
	6-month old		12-month old		18-month old
n	R72	P72	R72	P72	R72	P72
1	25.1	38.1	47.9	34.5	43.6	47.4
2	23.6	16.6	53.7	26.2	63.1	37
3	21.4	23.5	34.4	30.2	38.6	30
4	24.8	19.2	34.4	27.5	56.68	42.6
5	22.3	34	30.6	30.3	51.3	41.7
6			33.29	29.6	42.7	36.3
Mean	23.44	26.28	39.0483	29.7167	49.33	39.1667
SD	1.5884	9.36574	9.38904	2.85476	9.37485	6.04869
p-value	0.261 (R72 vs P72)		0.021 (R72 vs P72)		0.025 (R72 vs P72)
Significance			*		*
Note: Data collected from unpaired samples were analyzed using one-tailed Student's t-test.

## Sheet: Fig 5D&E
Figure 5-Source data 3
Figure 5D The percentageof proliferating HSCs in the bone marrow of 129SVsl R72 and P72 mice at different ages
	6-month old		12-month old		18-month old		22-month old
n	R72	P72	R72	P72	R72	P72	R72	P72
1	48.8	46.2	37.5	40.9	31.3	33.3	23.8	31.3
2	45.5	42.9	37.8	39.9	35.4	38.9	36.2	38.9
3	43.9	46	40.3	40.6	28.8	36.8	30.9	36.4
4	44.7	42.4	36.6	40	31	36.8	22.8	33.2
5	43.56	45.87	31.7	39.8	30.5	34.1	27.9	30.4
Mean	45.292	44.674	36.78	40.24	31.4	35.98	28.32	34.04
SD	2.09984	1.85981	3.15389	0.482701	2.43619	2.2687	5.4733	3.55851
p-value	0.318		0.021 (R72 vs P72)		0.008 (R72 vs P72)		0.043 (R72 vs P72)
Significance			*		*		*
Figure 5E The percentageof proliferating HSCs in the bone marrow of C57BL/6J R72 and P72 mice at different ages.
	6-month old		12-month old		18-month old
n	R72	P72	R72	P72	R72	P72
1	59.7	61.5	48.7	53.7	45.6	48.88
2	55.4	53.6	48.5	53.9	44.9	47.3
3	50.43	54.6	40.73	47.6	43.9	46.2
4	57.38	57.82	42.77	49.98	43.7	47.96
5	55.52	57.2	46.36	56.2	38.25	42.32
Mean	55.686	56.944	45.412	52.276	43.27	46.532
SD	3.41748	3.09301	3.54072	3.4351	2.90981	2.54918
p-value	0.279 (R72 vs P72)		0.007 (R72 vs P72)		0.048 (R72 vs P72)
Significance			*		*
Note: Data collected from unpaired samples were analyzed using one-tailed Student's t-test.
