# Supplementary material for: A polymorphism in the tumor suppressor p53 affects aging and longevity in mouse models
Source: eLife journal article supplement (doi:10.7554/elife.34701), 2018-03-20
Supplement: supp [file elife-34701-supp-v1.zip › elife_poa_e34701_Figure_6_source_data_1.xlsx]

## Sheet: Fig 6B
Figure 6-Source data 1
Figure 6B Percentage of CD45.2 cells in peripheral blood at 16 weeks after engraftment
129SVsl mice						C57BL/6J mice
	6-month old		18-month old				6-month old		18-month old
	R72	P72	R72	P72			R72	P72	R72	P72
1	79.26	78.52	68.57	78.62		1	77.92	70.82	52.27	70.49
2	78.75	80.37	63.95	70.33		2	79.92	79.4	57.26	74.33
3	75.84	82.54	67.88	76.31		3	71.43	77.92	60.32	78.17
4	75.15	78.72	71.53	76.61		4	75.67	78.83	58.39	73.77
5	80.62	78.1	65.19	80.44		5	74.63	76.11	55.07	76.45
6	80.75	75.88	71.04	74.72		6	78.95	74.02	54.02	71.24
Mean	78.4	79.02	68.03	76.17		Mean	76.42	76.18	56.22	74.08
SD	2.38	2.25	3.04	3.48		SD	3.15	3.28	2.98	2.95
p-value	0.325 (R72 vs P72)		<0.001 (R72 vs P72)			p-value	0.451 (R72 vs P72)		<0.001 (R72 vs P72)
Significance			*			Significance			*
Note: Data collected from unpaired samples were analyzed using one-tailed Student's t-test.

## Sheet: Fig 6C
Figure 6-Source data 2
Figure 6C The mRNA expression levels of p21, Puma and Noxa in bone marrow from 129SVsl p53 R72 and P72 mice
p21						Puma						Noxa
	6-month old		18-month old				6-month old		18-month old				6-month old		18-month old
n	R72	P72	R72	P72		n	R72	P72	R72	P72		n	R72	P72	R72	P72
1	1.11	0.99	2.43	2.67		1	0.94	0.75	0.43	0.34		1	0.63	0.38	0.22	0.24
2	1.1	1.37	2.22	3.26		2	0.85	0.54	0.56	0.48		2	1.26	0.63	0.45	0.38
3	0.78	1.61	2.4	3.28		3	0.86	0.37	0.42	0.52		3	1.13	0.76	0.45	0.15
4	0.99	0.83	2.17	2.29		4	1.37	0.96	0.38	0.42		4	0.97	0.5	0.33	0.31
Mean	0.995	1.2	2.31	2.88		Mean	1.01	0.66	0.45	0.44		Mean	0.9975	0.5675	0.3625	0.27
SD	0.15	0.35	0.13	0.48		SD	0.25	0.26	0.08	0.08		SD	0.27	0.16	0.11	0.1
p-value	0.165 (R72 vs P72)		0.031 (R72 vs P72)			p-value	0.048 (R72 vs P72)		0.448 (R72 vs P72)			p-value	0.018 (R72 vs P72)		0.129 (R72 vs P72)
Significance			*			Significance	*					Significance	*
Note: Data collected from unpaired samples were analyzed using one-tailed Student's t-test.
