# Supplementary figures and images for: A polymorphism in the tumor suppressor p53 affects aging and longevity in mouse models
Source: eLife journal article supplement (doi:10.7554/elife.34701), 2018-03-20

**Figure 1-figure supplement 1**

**A**

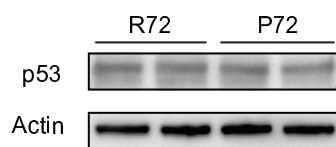

**B**

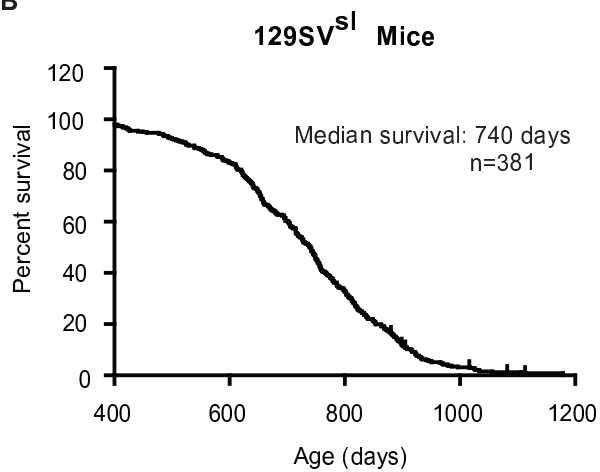

**C**

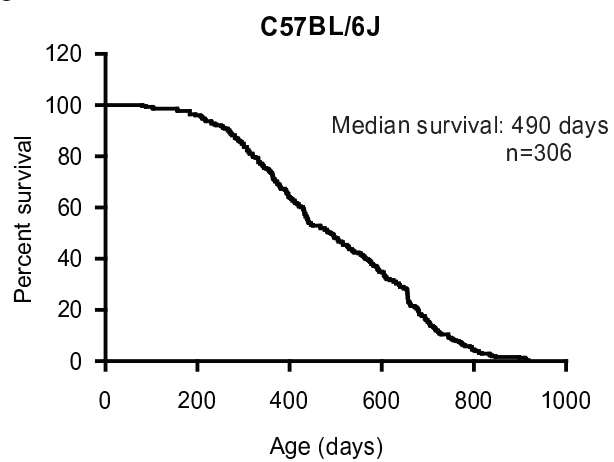

Supplement: supp [file elife-34701-supp-v1.zip › elife_poa_e34701_Figure_1_figure_supplement_1.pdf]

Figure 5-figure supplement 1

129SV<sup>sl</sup> mice LT-HSC gating strategy

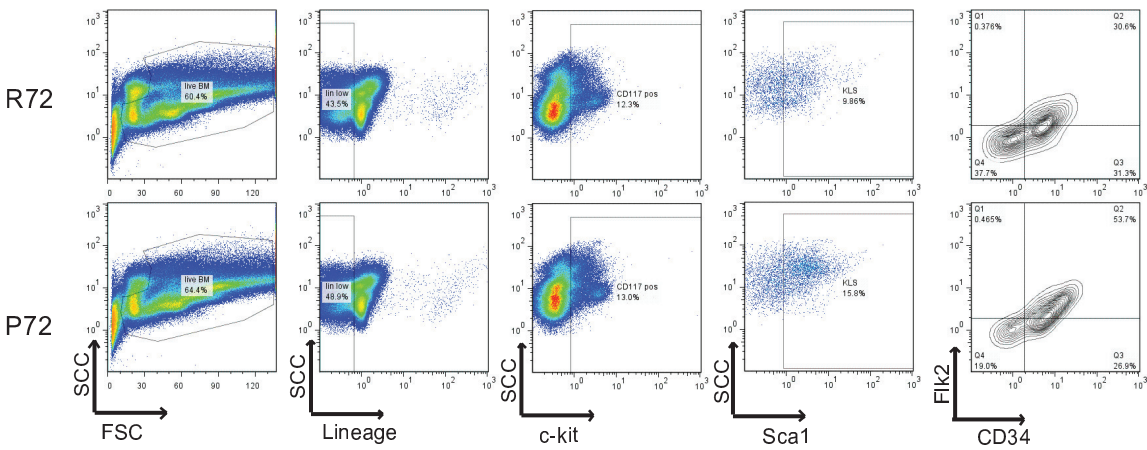

Supplement: supp [file elife-34701-supp-v1.zip › elife_poa_e34701_Figure_5_figure_supplement_1.pdf]
